# Supplementary material
Source: PubMed Central journal article supplement (PMC5970275)
Supplement: NIHMS474917-supplement-Supplementary_Information.pdf [file NIHMS474917-supplement-Supplementary_Information.pdf]

## Supporting Information:

Movie 1: An example of the flipping of A1492 and A1493 in the context of the 30S ribosomal subunit (simulation S1). Ribosomal RNA is shown in violet. Ribosomal proteins are shown in maroon. Small subunit rRNA A1493 (cyan) and A1492 (green) flip in and out of the decoding helix (H44). Hexa-hydrated magnesium is shown in translucent. The movie displays a minute fraction of the total simulation ( $< 1/1,000^{\text{th}}$ ).

Movie 2: Gentamicin unbinding from the ribosomal A site (simulation S2). Ring I (white), ring II (orange) and ring III (yellow) of gentamicin probe the non-specific energy landscape near the binding site. As in movie 1, movie 2 displays a minute fraction of the total simulation ( $< 1/1,000^{\text{th}}$ ).

## Forcefield parameters for MgW<sub>6</sub> (GROMACS)

[ moleculetype ]

```
; molname      nrexcl
MO6             1
```

[ atoms ]

```
; nr  type  resnr  residue  atom  cgnr  charge  mass
  1  amber99_33  1  MO6    MG    1    +2.0   24.30000
  2  amber99_42  1      MO6   O1    2    -0.834  16.00000
  3  amber99_27  1      MO6   H11   2     0.417   4.00800
  4  amber99_27  1      MO6   H12   2     0.417   4.00800
  5  amber99_42  1      MO6   O2    3    -0.834  16.00000
  6  amber99_27  1      MO6   H21   3     0.417   4.00800
  7  amber99_27  1      MO6   H22   3     0.417   4.00800
  8  amber99_42  1      MO6   O3    4    -0.834  16.00000
  9  amber99_27  1      MO6   H31   4     0.417   4.00800
 10  amber99_27  1      MO6   H32   4     0.417   4.00800
 11  amber99_42  1      MO6   O4    5    -0.834  16.00000
 12  amber99_27  1      MO6   H41   5     0.417   4.00800
 13  amber99_27  1      MO6   H42   5     0.417   4.00800
```

|    |            |   |     |     |   |        |          |
|----|------------|---|-----|-----|---|--------|----------|
| 14 | amber99_42 | 1 | MO6 | O5  | 6 | -0.834 | 16.00000 |
| 15 | amber99_27 | 1 | MO6 | H51 | 6 | 0.417  | 4.00800  |
| 16 | amber99_27 | 1 | MO6 | H52 | 6 | 0.417  | 4.00800  |
| 17 | amber99_42 | 1 | MO6 | O6  | 7 | -0.834 | 16.00000 |
| 18 | amber99_27 | 1 | MO6 | H61 | 7 | 0.417  | 4.00800  |
| 19 | amber99_27 | 1 | MO6 | H62 | 7 | 0.417  | 4.00800  |

[ bonds ]

| ;i | j  |   | funct | length   | force.c. |          |  |
|----|----|---|-------|----------|----------|----------|--|
| 1  | 2  | 1 | 0.204 | 343092.8 | 0.204    | 243092.8 |  |
| 1  | 5  | 1 | 0.204 | 343092.8 | 0.204    | 243092.8 |  |
| 1  | 8  | 1 | 0.204 | 343092.8 | 0.204    | 243092.8 |  |
| 1  | 11 | 1 | 0.204 | 343092.8 | 0.204    | 243092.8 |  |
| 1  | 14 | 1 | 0.204 | 343092.8 | 0.204    | 243092.8 |  |
| 1  | 17 | 1 | 0.204 | 343092.8 | 0.204    | 243092.8 |  |
| 2  | 3  | 1 | 0.1   | 345000   | 0.1      | 345000   |  |
| 2  | 4  | 1 | 0.1   | 345000   | 0.1      | 345000   |  |
| 5  | 6  | 1 | 0.1   | 345000   | 0.1      | 345000   |  |
| 5  | 7  | 1 | 0.1   | 345000   | 0.1      | 345000   |  |
| 8  | 9  | 1 | 0.1   | 345000   | 0.1      | 345000   |  |
| 8  | 10 | 1 | 0.1   | 345000   | 0.1      | 345000   |  |
| 11 | 12 | 1 | 0.1   | 345000   | 0.1      | 345000   |  |
| 11 | 13 | 1 | 0.1   | 345000   | 0.1      | 345000   |  |
| 14 | 15 | 1 | 0.1   | 345000   | 0.1      | 345000   |  |
| 14 | 16 | 1 | 0.1   | 345000   | 0.1      | 345000   |  |
| 17 | 18 | 1 | 0.1   | 345000   | 0.1      | 345000   |  |
| 17 | 19 | 1 | 0.1   | 345000   | 0.1      | 345000   |  |

[ angles ]

| ;i | j | k  | funct | angle  | force.c. |        |     |
|----|---|----|-------|--------|----------|--------|-----|
| 11 | 1 | 17 | 1     | 180.00 | 583      | 180.00 | 383 |
| 2  | 1 | 5  | 1     | 180.00 | 583      | 180.00 | 383 |
| 8  | 1 | 14 | 1     | 180.00 | 583      | 180.00 | 383 |
| 2  | 1 | 8  | 1     | 90.00  | 583      | 90.00  | 383 |
| 2  | 1 | 11 | 1     | 90.00  | 583      | 90.00  | 383 |
| 2  | 1 | 14 | 1     | 90.00  | 583      | 90.00  | 383 |
| 2  | 1 | 17 | 1     | 90.00  | 583      | 90.00  | 383 |
| 5  | 1 | 8  | 1     | 90.00  | 583      | 90.00  | 383 |
| 5  | 1 | 11 | 1     | 90.00  | 583      | 90.00  | 383 |
| 5  | 1 | 14 | 1     | 90.00  | 583      | 90.00  | 383 |
| 5  | 1 | 17 | 1     | 90.00  | 583      | 90.00  | 383 |
| 3  | 2 | 4  | 1     | 109.47 | 383      | 109.47 | 383 |

|    |    |    |   |           |           |
|----|----|----|---|-----------|-----------|
| 6  | 5  | 7  | 1 | 109.47383 | 109.47383 |
| 9  | 8  | 10 | 1 | 109.47383 | 109.47383 |
| 12 | 11 | 13 | 1 | 109.47383 | 109.47383 |
| 15 | 14 | 16 | 1 | 109.47383 | 109.47383 |
| 18 | 17 | 19 | 1 | 109.47383 | 109.47383 |

[ dihedrals ]

| ; ai | aj | ak | al | funct | q0  | kq      |
|------|----|----|----|-------|-----|---------|
| 5    | 2  | 14 | 8  | 2     | 0.0 | 1.8e+02 |
| 11   | 17 | 2  | 5  | 2     | 0.0 | 1.8e+02 |
| 11   | 17 | 14 | 8  | 2     | 0.0 | 1.8e+02 |
